# Supplementary material for: The relationship between fear generalization and pain modulation: an investigation in healthy participants
Source: publisher site journal article supplement (doi:10.1515/sjpain-2019-0065), 2019-08-21
Supplement: Supplementary file 1 [file sjpain-2019-0065_suppl.docx]

Appendix A

Statistical analyses of trial-by-trial pain-related fear and pain-US expectancy ratings during transfer-of-acquisition

A prerequisite to test for generalization effects on the trial-by-trial pain-related fear ratings and trial-by-trial pain-US expectancy ratings was a successful transfer of the acquisition effect to the signaled setup. Therefore, RM ANOVAs were run on pain-related fear and trial-by-trial pain-US expectancy ratings during transfer-of-acquisition as a manipulation check.

Trial-by-trial pain-related fear ratings during transfer-of-acquisition.

A 2 x 4 [Stimulus Type (CS+/CS-) x Trial (T1-4)] RM ANOVA was run on the trial-by-trial pain-related fear ratings and the analysis revealed a significant main effect of Stimulus Type, *F*(1, 49) = 59.86, *p* < .001, = .55, but not of Trial, *F* < 1. The interaction effect between Stimulus Type and Trial was significant, *F*(3, 147) = 4.36, *p* < .01, *ε* = .82, = .08. Planned comparisons confirmed that the differential fear acquisition effect successfully transferred to the signaled setup: the effect was present during the first trial, *F*(1, 49) = 40.31, *p* < .001, *d* = 1.13, and was still present during the last, *F*(1 ,49) = 59.51, *p* < .001, *d* = 1.44 (see *Figure A1*).

*Figure A1*. Mean pain-related fear and trial-by-trial pain-US expectancy ratings for conditioned movements (CS+/-) during transfer-of-acquisition trials (T1-4). Error bars represent standard errors.

Trial-by-trial pain-US expectancy ratings during transfer-of-acquisition.

A 2 x 4 [Stimulus Type (CS+/CS-) x Trial (T1-4)] RM ANOVA was run on the trial-by-trial pain expectancy ratings during the transfer-of-acquisition phase. The analysis revealed a main effect of Stimulus Type, *F*(1, 49) = 105.29, *p* < .001, = .68, but not of Trial, *F* < 1, in the trial-by-trial pain-US expectancy ratings during the transfer-of-acquisition phase. The interaction effect between Stimulus Type and Trial was significant, *F*(3, 147) = 3.66, *p* < .05, *ε* = .90, = .07. Planned comparisons confirmed that the difference between the CS+ and the CS- was already significant during the first trial, *F*(1 ,49) = 55.72, *p* < .001, *d* = 1.58, and this effect was still present during the last trial, *F*(1 ,49) = 120.62, *p* < .001, *d* = 2.37, confirming a successful transfer of acquisition to the signaled setup (see *Figure 1*).

Appendix B

**Statistical analysis of retrospective affective valence, arousal, and sense of being in control of the CSs.**

Three separate 2 x 3 [Stimulus Type (CS+ /CS-) x Phase (PRAC/ACQ/GEN)] repeated measures analyses of variance (RM ANOVAs) were run on the retrospective SAM ratings for affective valence, arousal and control. Analysis of the SAM affective valence ratings revealed significant main effects of Stimulus Type, *F*(1, 48) = 50.51, *p* < .001, = .51, and Phase, *F*(2, 96) = 21.38, *p* < .001, = .91, = .31. The interaction effect between Stimulus Type and Phase was also significant, *F*(2, 96) = 28.00, *p* < .001, = .78, = .37, suggesting that the effect of stimulus type increased over time. Planned comparisons showed that participants did not report any differences in affective valence between the CS+ and CS- after the practice phase, *F* < 1. As expected, participants reported to be unhappier when performing CS+ movements compared to CS- movements after the acquisition phase, *F*(1, 48) = 68.75, *p* < .001, *d* = 1.51, this effect remained significant after the generalization phase, *F*(1, 48) = 50.77, *p* < .001, *d* = 1.26 (see Table B1).

Analysis of the SAM arousal ratings showed a main effect of Stimulus Type, *F*(1, 48) = 59.71, *p* < .001, = .55, and Phase, *F*(2, 96) = 22.29, *p* < .001, = .81, = .32. The interaction effect between Stimulus Type and Phase was significant as well, *F*(2, 96) = 15.57, *p* < .001, = .93, = .24. Planned comparisons showed no significant difference in arousal ratings between the CS+ and CS- after the practice phase, *F*(1, 48) = 1.14, *p* = .29. After the acquisition phase, participants reported to be more aroused when performing CS+ movements compared to CS- movements, *F*(1, 48) = 84.35, *p* < .001, *d* = 1.49, and this difference was still present after generalization, *F*(1, 48) = 20.80, *p* < .001, *d* = .75.

Analysis of the SAM control ratings again revealed significant main effects of Stimulus Type, *F*(1, 48) = 19.09, *p* < .001, = .28, and Phase, *F*(2, 96) = 22.63, *p* < .001, = .76, = .32, and a significant interaction effect, *F*(2, 96) = 8.62, *p* < .001, = .85, = .15. Planned comparisons again indicated no differences in control experienced when performing the CS+ and the CS- during the practice phase, *F* < 1. As expected, participants reported feeling less in control when performing CS+ movements compared to CS- movements after the acquisition phase, *F*(1, 48) = 20.15, *p* < .001, *d* = .69, and this effect persisted throughout the generalization phase, *F*(1, 48) = 21.30, *p* < .001, *d* = .78.

Table B1

*Mean retrospective SAM ratings and standard deviations*

| N = 50 | Affective valence | | | | Arousal | | | | Control | | | |
| --- | --- | --- | --- | --- | --- | --- | --- | --- | --- | --- | --- | --- |
|  | CS+ | | CS- | | CS+ | | CS- | | CS+ | | CS- | |
|  | *M* | *SD* | *M* | *SD* | *M* | *SD* | *M* | *SD* | *M* | *SD* | *M* | *SD* |
| PRAC | 2.31 | .98 | 2.35 | .97 | 3.90 | 1.14 | 4.08 | 1.06 | 3.78 | 1.05 | 3.90 | 1.08 |
| ACQ | 3.51* | 1.00 | 2.10* | .85 | 2.55* | 1.10 | 4.02* | .83 | 2.86* | 1.21 | 3.65* | 1.09 |
| GEN | 3.65* | .93 | 2.49* | .92 | 2.63* | 1.18 | 3.45* | .96 | 2.37* | .99 | 3.16* | 1.05 |

*Note*. * = Significant CS+/CS- difference (*p* < .001). Means ± standard deviations of SAM affective valence, arousal and control ratings for conditioned movements (CS+/-) after practice (PRAC), acquisition (ACQ) and generalization (GEN) phase

Appendix C

**Exploratory analyses: influence of psychological traits on generalization gradient**

For exploratory purposes and to map individual differences, we collected four psychological trait questionnaires measuring (1) positive and negative affect (the Positive and Negative Affect Schedule (PANAS); [1]), (2) trait anxiety (trait version of the State-Trait Anxiety Inventory (STAI-T); [2]), (3) fear of pain (The Fear of Pain Questionnaire (FPQ); [3]) and (4) pain catastrophizing (Pain Catastrophizing Scale (PCS); [4]). These data were collected immediately after the experiment.

Exploratory analyses were conducted on generalization data including the questionnaire scores (Negative Affect, Trait Anxiety, Fear of Pain and Pain Catastrophizing standardized (total) scores). To test forced-choice data, a logistic regression was carried out, including the psychological trait scores as predictors. Scores were also added as covariates in the RM ANOVAs conducted on generalization data (both pain ratings and fear ratings). Median splits were used to visualize the effects. Specifically, we were interested in interaction effects between psychological trait questionnaire scores and stimulus type, indicating varying generalization gradients.

First, we included the questionnaire data in the analyses of the pain ratings: the forced choice ratings, as well as the trial-by-trial pain intensity and unpleasantness ratings. However, generalization gradients did not change based on the psychological trait questionnaires (i.e., flat gradients indicating no generalization of pain). In other words, psychological trait scores did not moderate relationships between stimulus type and pain ratings.

Next, we investigated the effects of psychological trait data on our pain-related fear measures: trial-by-trial pain-related fear and pain-US expectancy ratings, and startle amplitudes. The generalization pattern remained the same for the trial-by-trial fear ratings. In the analysis of trial-by-trial expectancy ratings, the three-way interactions Stimulus Type x Block x Negative Affect (*F*(6, 282) = 3.52, *p* < .01, = .07) and Stimulus Type x Block x Trait Anxiety (*F*(6, 282) = 4.42, *p* < .01, = .09) were significant. Further investigation of the former three-way interaction showed that the Stimulus Type x Negative Affect interactions were not significant when analyzing each block separately (*F* < 1 for both blocks). Similarly, investigation of the latter three-way interaction showed that the Stimulus Type x Trait Anxiety interaction just failed to reach significance when analyzing the first block separately: *F*(6, 288) = 2.87, *p* = .05, was not significant for the second block, *F*(6, 282) = 1.46, *p* = .23. These results again indicate that the generalization pattern did not change when including the psychological trait scores. However, when visualizing the trial-by-trial expectancy data of the first generalization block using a median split, a flattened generalization gradient for participants scoring high on trait anxiety emerges (Figure C1), which is in line with the theoretical expectations and previous research.

# References

[1] Watson D, Clark LA, Tellegen A. Development and validation

of brief measures of positive and negative affect: the PANAS

Scales. J Pers Soc Psychol 1988;54:1063–70.

[2] Spielberger CD. Manual for the State-Trait Anxiety Inventory (STAI

Form Y). Palo Alto, CA: Consulting Psychologists Press, 1983.

[3] McNeil DW, Rainwater AJ. Development of the Fear of Pain

Questionnaire–III. J Behav Med 1998;21:389–410.

[4] Sullivan MJL, Bishop SR, Pivik J. The Pain Catastrophizing

Scale: development and validation. Psychol Assess

1995;7:524–32.

*Figure C1.* Mean trial-by-trial pain-US expectancy ratings for the original conditioned (CS+/-) and generalization (GS1-5) movements during the during generalization blocks (GEN1-2), with separate lines for participants scoring high and low on the STAI (median spit). Error bars represent standard errors.

Analysis of the startle data during generalization using the questionnaire data revealed a significant Stimulus Type x Negative Affect interaction, *F*(6, 282) = 4.14, *p* < .01, = .08. Visualizing these data using a median split showed less differential responding in participants scoring high on negative affect (see Figure C2).

*Figure C2*. Mean startle amplitudes during the original conditioned movements (CS+/-) and generalization movements (GS1-5) during generalization phase, with separate lines for participants scoring high and low on the negative affect subscale of the PANAS (median spit). Error bars represent standard errors.
